# Supplementary material for: Characterization of Circulating and Endothelial Progenitor Cells in Patients With Extreme-Duration Type 1 Diabetes
Source: Oxford University Press journal article supplement (doi:10.2337/dc13-2547), 2014-04-30

**Supplementary Table 1.**

|                                    | EPC         |     | CPC         |     |
|------------------------------------|-------------|-----|-------------|-----|
|                                    | p           | n   | p           | n   |
| <b>LDL (mg/dL)</b>                 | 0.16        | 171 | 0.55        | 171 |
| <b>HDL (mg/dL)</b>                 | <b>0.02</b> | 172 | 0.78        | 172 |
| <b>Total Cholesterol (mg/dL)</b>   | <b>0.05</b> | 172 | 0.94        | 172 |
| <b>Triglycerides (mg/dL)</b>       | 0.36        | 172 | 0.66        | 172 |
| <b>sBP (mmHg)</b>                  | 0.23        | 168 | 0.34        | 168 |
| <b>dBp (mmHg)</b>                  | <b>0.04</b> | 168 | 0.11        | 168 |
| <b>BMI (kg/m<sup>2</sup>)</b>      | 0.50        | 172 | 0.99        | 172 |
| <b>Lipid-Lowering drugs</b>        | 0.14        | 168 | 0.68        | 168 |
| <b>Blood Pressure drugs</b>        | 0.19        | 168 | 0.45        | 168 |
| <b>gender</b>                      | 0.63        | 172 | 0.95        | 172 |
| <b>Duration of disease (years)</b> | 0.91        | 172 | 0.60        | 172 |
| <b>Age (years)</b>                 | 0.10        | 172 | <b>0.05</b> | 172 |
| <b>HbA1c</b>                       | 0.10        | 172 | 0.42        | 172 |
| <b>Smoking history</b>             | 0.43        | 171 | 0.96        | 171 |

**Supplementary Figure 1.** Nephropathy does not correlate with EPC or SDF-1 levels in Medalists.  
203x69mm (300 x 300 DPI)

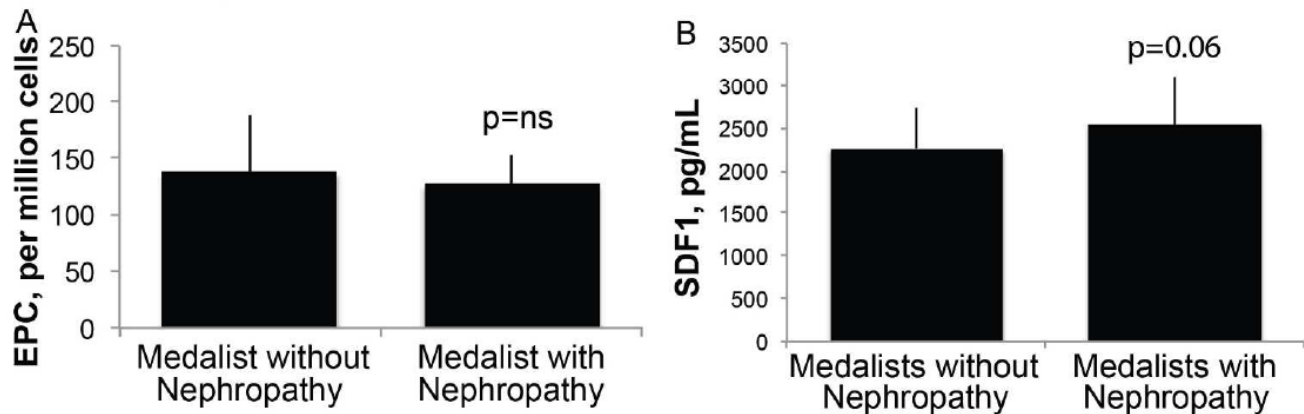

Supplement: dc132547supplementarydata.pdf [file dc132547supplementarydata.pdf]
